1 **Title**

2 Repetition plasticity in primary auditory cortex occurs across long timescales for spectrotemporally  
3 randomized pure-tones

4  
5 **Authors**

6 Nasiru K. Gill<sup>1</sup> and Nikolas A. Francis<sup>1,2,\*</sup>

7  
8 **Affiliations**

9 <sup>1</sup>Department of Biology, University of Maryland, College Park, MD, 20742.

10 <sup>2</sup>Brain and Behavior Institute, University of Maryland, College Park, MD, 20742.

11 \*Corresponding author.

12  
13 **Abstract**

14 Repetition plasticity is a ubiquitous property of sensory systems in which repetitive sensation causes  
15 either a decrease (“repetition suppression”, i.e. “adaptation”) or increase (“repetition enhancement”,  
16 i.e. “facilitation”) in the amplitude of neural responses. Timescales of repetition plasticity for sensory  
17 neurons typically span milliseconds to tens of seconds, with longer durations for cortical vs subcortical  
18 regions. Here, we used 2-photon (2P) imaging to study repetition plasticity in mouse primary auditory  
19 cortex (A1) layer 2/3 (L2/3) during the presentation of spectrotemporally randomized pure-tone  
20 frequencies. Our study revealed subpopulations of neurons with repetition plasticity for equiprobable  
21 frequencies spaced minutes apart over a 20-minute period. We found both repetition suppression and  
22 enhancement in individual neurons and on average across populations. Each neuron tended to show  
23 repetition plasticity for 1-2 pure-tone frequencies near the neuron’s best frequency. Moreover, we  
24 found correlated changes in neural response amplitude and latency across stimulus repetitions.  
25 Together, our results highlight cortical specialization for pattern recognition over long timescales in  
26 complex acoustic sequences.

27

28 **Main Text**

29 The dynamics of neural responses to repetitive sensation, i.e., “repetition plasticity”, are influenced by  
30 the irregularity and duration of time-intervals between sensory events<sup>1-14</sup>. “Repetition suppression,” i.e.,  
31 “adaptation,” is a decrease in neuronal responsiveness to repeated sensory input and is thought of as a  
32 mechanism for efficient coding of sensory information. “Repetition enhancement,” i.e., “facilitation”, is  
33 an increase in neuronal responsiveness to repeated sensory input and is believed to reflect neural  
34 predictions about the reoccurrence of sensory events. In the auditory system, repetition plasticity has  
35 been observed in the inferior colliculus<sup>7,15</sup>, medial geniculate body<sup>13</sup>, and auditory cortex<sup>1,4,5,8-12,14,16-19</sup>.  
36 It has also been observed in visual<sup>3,5</sup> and somatosensory cortices<sup>5,20</sup>. Mechanisms such as synaptic  
37 depression and interneuron inhibition are believed to play a role in both cortical and subcortical  
38 repetition plasticity<sup>2,3,6,13,17-19,21-24</sup>.

39 The spectrotemporal context of a sound is an important factor in repetition plasticity. For  
40 example, in mice the magnitude of stimulus-specific adaptation in auditory cortex depends on the  
41 proportion of “standard” vs. “deviant” pure-tone frequencies presented during an experiment<sup>4,5,8-  
42 12,14,17,19</sup>. Repetition plasticity in auditory cortex has been observed on timescales ranging from tens of  
43 milliseconds to tens of seconds<sup>5,8-12,19,25</sup>, in comparison to subcortical structures where repetition  
44 plasticity occurs on a shorter timescale, typically on the order of tens to hundreds of milliseconds<sup>1,13,25</sup>.  
45 Thus, auditory cortex may be specialized to encode global information about irregular and slow acoustic  
46 sequences<sup>1,6,23,25</sup>.

47 To investigate cortical specialization for long timescales in repetition plasticity, we used 2P  
48 imaging to study how neurons in mouse A1 L2/3 respond to pure-tone frequencies whose repetition  
49 occurred over minutes-long intervals and with low predictability due to equiprobable stimulus statistics  
50 (figure 1). We recorded auditory responses to spectrotemporally randomized pure-tones in 874 A1 L2/3  
51 neurons across 26 experiments in 6 awake Thy1-GCaMP6s mice<sup>26</sup> (figure 1e-k). We found repetition

52 plasticity that progressed slowly over an approximately 20-minute experiment in 48% of the total  
53 neuronal population (figure 2). Repetition plasticity occurred on average across subpopulations within a  
54 single experiment (middle rows in a1 and a2), and for individual neurons (bottom rows in a1 and a2).  
55 Note that while each trace in figure 2a is evenly spaced on the panels, during experiments the frequency-  
56 repetition interval was randomized, averaging at  $1 \pm 0.9$  minute standard deviations (SDs) between each  
57 of the 20 repetitions spanning the approximately 20-minute experiment (figure 1a-d; top of figure 2).

58 Figure 1a illustrates the time-course of stimulus presentation in our experiments. Pure-tones  
59 were presented at 70 dB SPL and 500 ms in duration, with 5 ms and 495 ms onset and offset ramps,  
60 respectively (figure 1b). Inter-stimulus intervals were randomly selected from a trimodal distribution  
61 peaking at 6, 7, or 8 s (figure 1c). For each presentation, the pure-tone frequency was randomly selected  
62 between 2-45 kHz (10 possible frequencies spaced 0.5 octaves apart) (figure 1d). Each frequency was  
63 repeated 20 times during an experiment. Thus, the presentation of each pure-tone frequency was  
64 equiprobable and irregularly distributed in time, forming a slow and complex acoustic sequence.

65 We began our experiments using widefield imaging to localize A1 in each mouse (figure 1e).  
66 Figure 1f shows a color-coded mapping of pure-tone frequency selectivity across space in auditory  
67 cortex, i.e., “tonotopy,”. A1 is identified by a rostro-caudal gradient of high-to-low frequencies in the  
68 posterior region of auditory cortex. Once A1 was localized in each mouse, we then used 2P imaging to  
69 record pure-tone responsiveness in populations of individual neurons that were approximately 150  $\mu\text{m}$   
70 below the cortical surface in A1 L2/3 (figure 1g). Figure 1h shows a heatmap of the average stimulus-  
71 aligned responses from individual neurons, sorted by peak-response latency. Most neurons (N=758,  
72 87%) had positive responses (increases from the silent baseline before a pure-tone in each presentation).  
73 A smaller population (N=116, 13%) had negative responses (decreases from baseline). The average  
74 traces across positive and negative response populations are shown in figure 1i. The average peak-

75 latency of neural responses to pure-tones was  $460 \text{ ms} \pm 230 \text{ ms}$  (SDs) (figure 1j, top panel), partly  
76 predicated by stimulus-locked responsiveness (figure 1h-j) and the sluggish rise-time of the GCaMP6s  
77 fluorescence indicator<sup>26</sup>.

78 To maximize the number of individual neurons across experiments, and to ensure that the neural  
79 population under study did not have a frequency-selectivity bias, we chose a different 2P field of view  
80 within A1 L2/3 for every experiment. For each neuron, we calculated the average magnitude of its  
81 response to each of the 10 pure-tone frequencies to create a frequency tuning curve (FTC). We then  
82 found the frequency with the largest response, i.e., the “best frequency,” (BF) from the FTC (figure 1j,  
83 bottom panel). FTCs from neurons with the same BF were averaged together and are plotted in figure  
84 1k, color-coded by BF. Our results show that we imaged neurons with BFs evenly distributed across the  
85 range of pure-tone frequencies, indicating that the mice had healthy hearing in the tested frequency  
86 range. Given our widefield tonotopy results, combined with stimulus-locked response latencies and well-  
87 defined FTCs, it is likely that we successfully targeted auditory neurons in A1 L2/3 during 2P imaging.

88 It is important to note that one might not expect repetition plasticity to occur in our experiments  
89 because of extensive spectrotemporal pure-tone randomization, and indeed, we did not find repetition  
90 plasticity on average across all frequency-repetitions for a given neuron ( $p > 0.05$ ) (figure 2d, top panel).  
91 However, upon finer parcellation of the data into individual frequency-repetitions (N=8004 repetitions),  
92 we found subpopulations of neurons with repetition suppression (N=215), repetition enhancement  
93 (N=200), or both (N=65) (Figure 2c).

94 Repetition plasticity occurred for only a subset of frequencies in each neuron. The average  
95 number of frequencies with repetition plasticity per neuron was  $1.3 \pm 0.7$  SDs. Figure 2e shows that  
96 the frequency tuning curves for both repetition suppression and enhancement tended to be uniform,  
97 and thus occurred across the range of presented frequencies. In contrast, figure 2f shows that the

98 frequency with the greatest (“best”) repetition plasticity tended to occur near the neuron’s BF, though  
99 the distributions of best repetition enhancement and suppression frequencies were skewed below the  
100 BF (averages:  $-0.25 \pm 1.7$  octave SDs,  $p=0.017$  and  $-0.1 \pm 1.6$  octave SDs,  $p=0.32$ , respectively).

101 Since cortical response amplitudes and latencies are both state- and stimulus-dependent in  
102 auditory cortex<sup>7,27,28</sup>, here we quantified the effect of slow and irregular stimulus repetition on neuronal  
103 peak-response latencies. Consistent with the opposing amplitude changes we observed for repetition  
104 suppression vs enhancement, we found that repetition suppression neurons tended to begin with short  
105 response latencies that became longer over repetitions, and vice versa for repetition enhancement  
106 neurons (Figure 2b, bottom panel). Thus, we find that repetition plasticity slowly and monotonically  
107 changes both the timing and amplitude of neural responses to sound.

108 Here we describe subpopulations of neurons in A1 L2/3 that encode stimulus repetition over a  
109 period lasting tens of minutes, despite extensive randomization in stimulus design. This long timescale  
110 of repetition plasticity reflects the importance of cortical processing for pattern recognition in slow and  
111 complex acoustic sequences. It may be important that our mice were naïve to hearing pure-tones at the  
112 start of the experiment. Thus, it is possible that the relative stimulus novelty drew their attention to the  
113 pure-tones, which may have affected neural activity in A1<sup>27,28</sup>. It remains to be seen how mechanisms  
114 such as synaptic depression and interneuron inhibition—processes typically associated with timescales  
115 limited to hundreds of milliseconds—might sustain repetition plasticity over minutes, but perhaps their  
116 involvement in long-range recurrent network activity plays a role<sup>6,22-25</sup>.

117

## 118 **Acknowledgements**

119 Supported by NIH R21DC017829 (NAF).

120

121 **Figures**

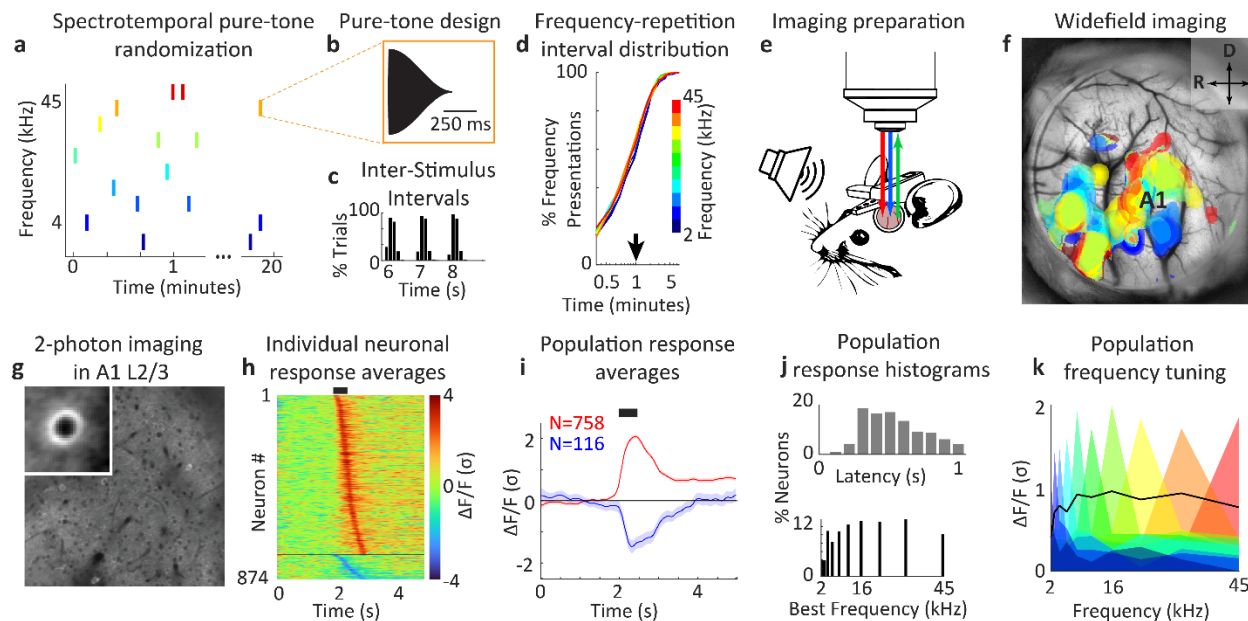

122

123 **Figure 1.** 2-photon (2P) imaging of neural activity in primary auditory cortex (A1) layer 2/3 (L2/3) in response to  
 124 pure-tones. **a.** Stimulus randomization over a 20-minute period. **b.** Stimulus design. **c.** Inter-stimulus Interval  
 125 histogram. **d.** Frequency-repetition interval cumulative distribution. The distribution for each possible frequency  
 126 is shown and color-coded. Note that the distributions are overlapping, indicating similar randomizations ( $1 \pm 0.9$   
 127 minute standard deviations (SDs)). **e.** Experimental setup. A 940 nm 2P laser (red) and 470 nm LED (blue) were  
 128 used to image neuronal activity (green) in A1 L2/3 of Thy1-GCaMP6s transgenic mice during pure-tone  
 129 presentations. **f.** Widefield imaging of auditory cortex. Frequency-dependent response amplitude was used to  
 130 color-code pixels in cortical space, i.e., to find ‘tonotopy’. A1 was identified by the rostrocaudal gradient of  
 131 tonotopy. **g.** Example 2P imaging field of view (FOV). The inset figure shows the average cell in the FOV. **h.**  
 132 Heatmap of individual neuronal responses to pure-tones, averaged across all stimuli for each neuron.  
 133 Fluorescence values ( $\Delta F/F$ ) were normalized by the standard deviation of response amplitude ( $\sigma$ ) for each neuron.  
 134 **i.** Population-averaged response traces. Red: positive responses, Blue: negative responses. Shading shows 2  
 135 standard errors of the mean (SEMs). **j.** Top panel: Population peak-latency response distribution. The average  
 136 peak-latency response was  $0.46 \pm 0.23$  s (SDs). Bottom panel: Best frequency (BF) histogram. **k.** Population-  
 137 average frequency tuning curves (FTCs). The black line shows the mean tuning curve across the recorded  
 138 population.

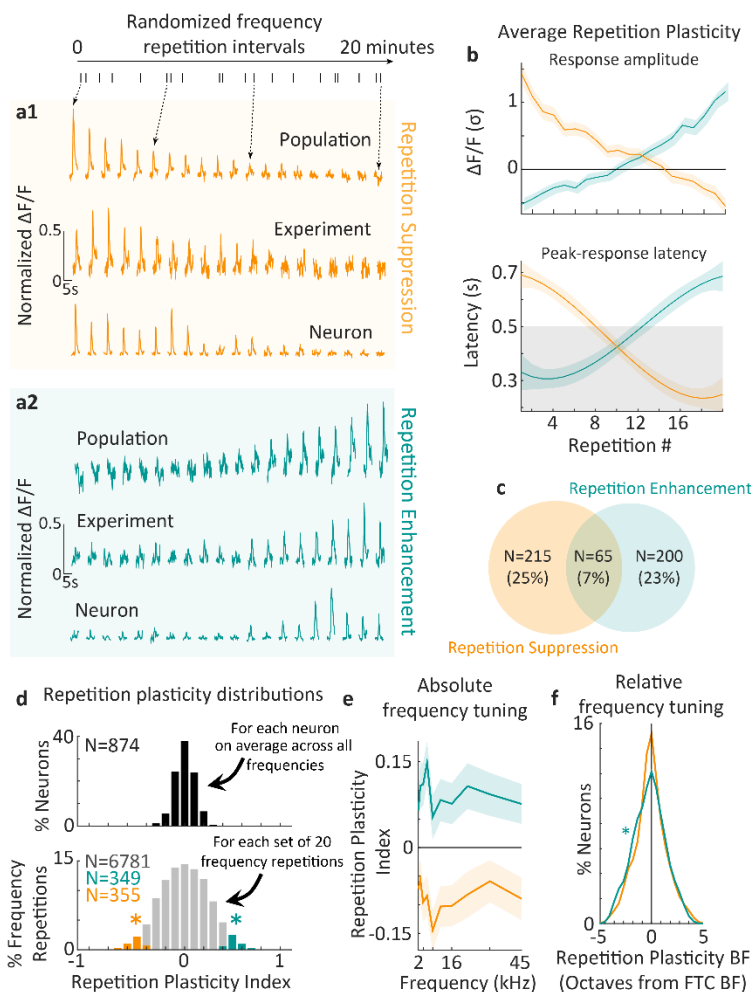

139

140 **Figure 2.** Repetition plasticity (RP) in A1 L2/3. **a1,a2.** RP was observed, (1) on average for the population (top rows  
 141 in a1 and a2), (2) on average within a single experiment (middle rows in a1 and a2), and (3) for individual neurons  
 142 (bottom rows in a1 and a2). Each row shows unity normalized  $\Delta F/F$  activity in response to a repetition of a given  
 143 pure-tone frequency. Note that the traces shown here are equally spaced in time for ease of visualization,  
 144 however, as shown at the top of the figure, during experiments frequency-repetition intervals were randomized  
 145 (average:  $1 \pm 0.9$  minutes SDs) over an approximately 20-minute period. **b.** Population-averaged RP (N=874). The  
 146 top panel shows the average  $\Delta F/F$  ( $\sigma$ ) amplitude in the 1-second interval following each stimulus presentation  
 147 during each of 20 pure-tone frequency repetitions. The bottom panel shows the average change in peak-response  
 148 latency across frequency-repetitions. **c.** Venn diagram of the subpopulation sizes for repetition suppression,  
 149 repetition enhancement, or both. **d.** RP distributions. The RP index was defined as the correlation coefficient  
 150 across each set of 20 pure-tone frequency-repetitions. The top panel shows that none of the neurons in our  
 151 population had significant repetition plasticity on average across all frequency-repetitions ( $p > 0.05$ ). However, the  
 152 lower panel expands the data in the top panel by showing the histogram of repetition plasticity for each set of 20  
 153 frequency-repetitions in each neuron (N=8004). Asterisks indicate significant repetition suppression (N=349) or  
 154 enhancement (N=355) ( $p < 0.05$ ). Gray bars show repetitions with insignificant RP (N=6781,  $p > 0.05$ ). **e.** Population-  
 155 averaged RP absolute frequency tuning curves. Significant ( $p < 0.016$ ) RP was found for all pure-tone frequencies  
 156 and with near-uniform magnitude across frequency. **f.** Distribution of RP BF relative to FTC BF. The RP BF tended  
 157 to occur near the FTC BF, though the average frequency with the greatest RP tended to be just below BF ( $-0.25 \pm$   
 158  $1.7$  octave SDs,  $p = 0.017$  and  $-0.1 \pm 1.6$  octave SDs,  $p = 0.32$ , respectively). In all panels, shading shows 2 SEMs.

159

## 160 **Methods**

### 161 *Experimental model and subject details*

162 All procedures were approved by the University of Maryland Institutional Animal Care and Use  
163 Committee. We used N=6 mice (3 female, 3 male) F1 offspring of CBA/CaJ mice (The Jackson  
164 Laboratory; stock #000654) crossed with transgenic C57BL/6J-Tg(Thy1GCaMP6s)GP4.3Dkim/J mice<sup>26</sup>  
165 (The Jackson Laboratory; stock #024275), 1.5-7 months old, in 26 total experiments. We used the F1  
166 generation of the crossed mice because they have healthy hearing at least 1 year into adulthood<sup>29</sup>. Mice  
167 were housed under a reversed 12 h-light/12 h-dark light cycle.

168

### 169 *Stimulus Design and Presentation*

170 We presented awake mice with 70 dB SPL pure-tones from a free-field speaker (Figure 1). Each pure-  
171 tone was 500 ms in duration, with 5 ms and 495 ms raised-cosine attack and decay ramps, respectively.  
172 The frequency of each pure-tone was randomly selected from 10 equiprobable values (2-45 kHz, 2 tones  
173 per octave). Each frequency was repeated 20 times per experiment, with a frequency-repetition interval  
174 of 1 +/- 0.9 minute standard deviations (SDs). Inter-stimulus intervals were randomized according to a  
175 tri-modal distribution (peaks at 6, 7, and 8 s) across the duration of each experiment, lasting  
176 approximately 20 minutes.

177

### 178 *Chronic window implantation*

179 Mice were given an intraperitoneal injection of dexamethasone (5mg/kg) at least 1 hour prior to surgery  
180 to prevent inflammation and edema. Mice were deeply anesthetized using isoflurane (5% induction, 0.5-  
181 2% for maintenance) and given a subcutaneous injection of cefazolin (500mg/kg). Internal body  
182 temperature was maintained at 37.5 C using a feedback-controlled heating blanket. Scalp fur was



183 trimmed using scissors and any remaining fur was removed using Nair. The scalp was disinfected with  
184 alternating swabs of 70% ethanol and betadine. A patch of skin over the temporal bone was removed  
185 and the underlying bone cleared of connective tissue using a scalpel. The temporal muscle was detached  
186 from the skull, and the skull was cleaned and dried. A thin layer of cyanoacrylate glue (VetBond) was  
187 applied to the exposed skull surface and a 3D printed stainless steel head-plate was affixed to the midline  
188 of the skull. Dental cement (C&B Metabond) was used to cover the entire head-plate. A circular  
189 craniotomy (3 mm diameter) was made over auditory cortex where the chronic imaging window was  
190 then implanted. The window was either of a stack of two 3 mm diameter coverslips or a 3.2 mm  
191 diameter, 1 mm thick uncoated sapphire window (Edmund Optics), glued with optical adhesive (Norland  
192 61) to a 5 mm diameter coverslip. The space between the glass and the skull was sealed with a silicone  
193 elastomer (Kwik-Sil). The edges of the glass and the skull were then sealed with dental cement. Finally,  
194 the entire implant except for the imaging window was coated with black dental cement created by  
195 mixing methyl methacrylate with iron oxide powder to reduce optical reflections. Meloxicam (0.5mg/kg)  
196 was given subcutaneously as a post-operative analgesic. Animals were allowed to recover for 2 weeks  
197 prior to imaging experiments.

198

### 199 *Widefield imaging*

200 Awake mice were placed into a 3D-printed plastic tube and head-restraint system. Blue excitation light  
201 was shone by an LED (470 nm) through an excitation filter (470 nm) and directed into the cranial window.  
202 Emitted fluorescence (F) from neurons in Thy1-GCaMP6s mice was collected through a 4x objective  
203 (Thorlabs), passed through a long-pass filter (cutoff: 505 nm), followed by a bandpass emission filter (531  
204 nm) attached to a pco.panda 4.2 CMOS camera. Images were acquired using Micro-manager software.

205 After acquiring an image of the cortical surface, the focal plane was advanced to approximately 500  $\mu\text{m}$   
206 below the surface.

207 Our goal was to visualize primary auditory cortex (A1) by identifying a rostro-caudal tonotopic  
208 gradient in the posterior region of auditory cortex. To visualize tonotopy, pure-tones were presented  
209 from a free field speaker, as described above. Widefield images were acquired at a 30 Hz rate and  
210 256x288 pixels. Using Matlab software (The Mathworks), image sequences for each tone frequency were  
211 averaged and processed with a homomorphic (contrast) filter to extract reflectance<sup>27</sup>. For each pixel,  
212  $\Delta F/F$  traces were calculated by finding the average F taken from the silent baseline period before a pure-  
213 tone presentation, subtracting that value from subsequent time-points until 3s after the pure-tone, then  
214 dividing all time-points by the baseline F. To visualize auditory responses, we kept traces with  $\Delta F/F$  within  
215 90% of the maximum response in the pixel-wise grand-average of  $\Delta F/F$  (i.e.,  $\Delta F/F_{90}$ ). Pixel-wise tonotopic  
216 frequencies were taken as the median frequency of the set of tones corresponding to the  $\Delta F/F_{90}$  traces  
217 (figure 1f).

218

### 219 *2-photon imaging*

220 After visualizing A1 tonotopic maps using widefield imaging, recording sites were selected for 2-photon  
221 (2P) imaging in A1 layer 2/3 (L2/3) for each mouse. Our 2P recording sites were chosen at various regions  
222 across A1 (figure 1f). We used a scanning microscope (Bergamo II series, Thorlabs) coupled to a pulsed  
223 femtosecond 2-photon laser with dispersion precompensation (Coherent Chameleon Discovery NX TPC).  
224 The microscope was controlled by ThorImage software. The laser was tuned to  $\lambda = 940 \text{ nm}$  to excite  
225 GCaMP6s. Fluorescence signals were collected through a 16 $\times$  0.8 NA microscope objective (Nikon).  
226 Emitted photons were directed through a 525 nm (green) bandpass filter onto a GaAsP photomultiplier  
227 tube. The field of view was 411 x 411  $\mu\text{m}$ . Imaging frames of 512 $\times$ 512 pixels (0.8  $\mu\text{m}$  per pixel) were

228 acquired at 30 Hz by bidirectional scanning of an 8 kHz resonant scanner. Laser power was set to  
229 approximately 70 mW, measured at the objective. During experiments, the objective's focal plane was  
230 lowered into L 2/3 (~150  $\mu\text{m}$  below the surface) before imaging neuronal responses to pure-tones.

231 After 2P experiments, all images were processed using Matlab<sup>27</sup>. Image motion was corrected  
232 using the TurboReg plug-in for MIJI (i.e., FIJI for Matlab). Figure 1g shows the average of registered  
233 images for GCaMP6s images. After manually selecting the centers of cell bodies, a ring-like region of  
234 interest (ROI) was cropped around the cell center. Overlapping ROI pixels (due to neighboring neurons)  
235 were excluded from analysis. For each labeled neuron, a raw fluorescence signal over time was extracted  
236 from somatic ROIs. Pixels within the ROI were averaged to create individual neuron fluorescence traces,  
237  $F_C(t)$ , for each trial of the experiment. Neuropil fluorescence was estimated for each cellular ROI using  
238 an additional ring-shaped ROI, which began 3 pixels from the somatic ROI. Pixels from the new ROI were  
239 averaged to obtain neuropil fluorescence traces,  $F_N(t)$ , for the same time-period as the individual neuron  
240 fluorescence traces. Pixels from regions with overlapping neuropil and cellular ROIs were removed from  
241 neuropil ROIs. Neuropil-corrected cellular fluorescence was calculated as  $\hat{F}_C(t) = F_C(t) - 0.7F_N(t)$ . Only  
242 cells with positive values obtained from averaging  $\hat{F}_C(t)$  across time were kept for analysis, since negative  
243 values may indicate neuropil contamination.  $\Delta F/F$  was calculated from  $\hat{F}_C(t)$ , for each neuron, by finding  
244 the average  $F$  taken from the silent baseline period before a pure-tone presentation, subtracting that  
245 value from subsequent time-points until 3s after the pure-tone, then dividing all time-points by the  
246 baseline  $F$ .

247

#### 248 *Quantifying repetition plasticity*

249 We quantified the modulation of cortical activity by repetitive sensation, i.e., “response plasticity”, by  
250 (1) taking the average  $\Delta F/F$  in the 1-second interval following each stimulus presentation, (2)

251 concatenating averaged  $\Delta F/F$  values to form a sequence of 20 values taken from each of the 20  
252 frequency-repetitions, and (3) calculating the correlation coefficient across a given set of 20 values. We  
253 refer to the resulting correlation coefficient as the, “Repetition plasticity index”. For the same sequence  
254 of 20 stimulus presentations, we quantified response latencies by finding the time of the peak  $\Delta F/F$   
255 response for each stimulus, then fitting a cubic polynomial to each set of 20 response latencies.

256

### 257 *Statistical analysis*

258 Statistical comparisons were performed using a non-parametric bootstrap test with 10000 iterations. All  
259 mean values are reported with either standard deviations (SDs) or standard errors of the mean (SEMs).

260

261

## 262 References

- 263 1 Asokan, M. M., Williamson, R. S., Hancock, K. E. & Polley, D. B. Inverted central auditory hierarchies for  
264 encoding local intervals and global temporal patterns. *Curr Biol* **31**, 1762-1770 e1764,  
265 doi:10.1016/j.cub.2021.01.076 (2021).
- 266 2 David, S. V. & Shamma, S. A. Integration over multiple timescales in primary auditory cortex. *J Neurosci*  
267 **33**, 19154-19166, doi:10.1523/JNEUROSCI.2270-13.2013 (2013).
- 268 3 Heintz, T. G., Hinojosa, A. J., Dominiak, S. E. & Lagnado, L. Opposite forms of adaptation in mouse visual  
269 cortex are controlled by distinct inhibitory microcircuits. *Nat Commun* **13**, 1031, doi:10.1038/s41467-022-  
270 28635-8 (2022).
- 271 4 Kang, H. & Kanold, P. O. Auditory memory of complex sounds in sparsely distributed, highly correlated  
272 neurons in the auditory cortex. *bioRxiv*, doi:10.1101/2023.02.02.526903 (2023).
- 273 5 Latimer, K. W. *et al.* Multiple Timescales Account for Adaptive Responses across Sensory Cortices. *J*  
274 *Neurosci* **39**, 10019-10033, doi:10.1523/JNEUROSCI.1642-19.2019 (2019).
- 275 6 Lee, J. H., Wang, X. & Bendor, D. The role of adaptation in generating monotonic rate codes in auditory  
276 cortex. *PLoS Comput Biol* **16**, e1007627, doi:10.1371/journal.pcbi.1007627 (2020).
- 277 7 Lesicko, A. M. H., Angeloni, C. F., Blackwell, J. M., De Biasi, M. & Geffen, M. N. Corticofugal regulation of  
278 predictive coding. *Elife* **11**, doi:10.7554/eLife.73289 (2022).
- 279 8 Regev, T. I., Markusfeld, G., Deouell, L. Y. & Nelken, I. Context Sensitivity across Multiple Time scales with  
280 a Flexible Frequency Bandwidth. *Cereb Cortex* **32**, 158-175, doi:10.1093/cercor/bhab200 (2021).
- 281 9 Rubin, J., Ulanovsky, N., Nelken, I. & Tishby, N. The Representation of Prediction Error in Auditory Cortex.  
282 *PLoS Comput Biol* **12**, e1005058, doi:10.1371/journal.pcbi.1005058 (2016).
- 283 10 Southwell, R. & Chait, M. Enhanced deviant responses in patterned relative to random sound sequences.  
284 *Cortex* **109**, 92-103, doi:10.1016/j.cortex.2018.08.032 (2018).
- 285 11 Ulanovsky, N., Las, L., Farkas, D. & Nelken, I. Multiple time scales of adaptation in auditory cortex neurons.  
286 *J Neurosci* **24**, 10440-10453, doi:10.1523/JNEUROSCI.1905-04.2004 (2004).
- 287 12 Zhou, B., Tomioka, R. & Song, W. J. Temporal profiles of neuronal responses to repeated tone stimuli in  
288 the mouse primary auditory cortex. *Hear Res* **430**, 108710, doi:10.1016/j.heares.2023.108710 (2023).
- 289 13 Kommajosyula, S. P., Bartlett, E. L., Cai, R., Ling, L. & Caspary, D. M. Corticothalamic projections deliver  
290 enhanced responses to medial geniculate body as a function of the temporal reliability of the stimulus. *J*  
291 *Physiol* **599**, 5465-5484, doi:10.1113/JP282321 (2021).
- 292 14 Nieto-Diego, J. & Malmierca, M. S. Topographic Distribution of Stimulus-Specific Adaptation across  
293 Auditory Cortical Fields in the Anesthetized Rat. *PLoS Biol* **14**, e1002397,  
294 doi:10.1371/journal.pbio.1002397 (2016).
- 295 15 Duque, D., Wang, X., Nieto-Diego, J., Krumbholz, K. & Malmierca, M. S. Neurons in the inferior colliculus  
296 of the rat show stimulus-specific adaptation for frequency, but not for intensity. *Sci Rep* **6**, 24114,  
297 doi:10.1038/srep24114 (2016).
- 298 16 Lu, K. *et al.* Implicit Memory for Complex Sounds in Higher Auditory Cortex of the Ferret. *J Neurosci* **38**,  
299 9955-9966, doi:10.1523/JNEUROSCI.2118-18.2018 (2018).
- 300 17 Natan, R. G. *et al.* Complementary control of sensory adaptation by two types of cortical interneurons.  
301 *Elife* **4**, doi:10.7554/eLife.09868 (2015).

- 302 18 Phillips, E. A. K., Schreiner, C. E. & Hasenstaub, A. R. Cortical Interneurons Differentially Regulate the  
303 Effects of Acoustic Context. *Cell Rep* **20**, 771-778, doi:10.1016/j.celrep.2017.07.001 (2017).
- 304 19 Seay, M. J., Natan, R. G., Geffen, M. N. & Buonomano, D. V. Differential Short-Term Plasticity of PV and  
305 SST Neurons Accounts for Adaptation and Facilitation of Cortical Neurons to Auditory Tones. *J Neurosci*  
306 **40**, 9224-9235, doi:10.1523/JNEUROSCI.0686-20.2020 (2020).
- 307 20 Adibi, M. & Lampl, I. Sensory Adaptation in the Whisker-Mediated Tactile System: Physiology, Theory, and  
308 Function. *Front Neurosci* **15**, 770011, doi:10.3389/fnins.2021.770011 (2021).
- 309 21 Reyes, A. D. Synaptic short-term plasticity in auditory cortical circuits. *Hear Res* **279**, 60-66,  
310 doi:10.1016/j.heares.2011.04.017 (2011).
- 311 22 Yarden, T. S. & Nelken, I. Stimulus-specific adaptation in a recurrent network model of primary auditory  
312 cortex. *PLoS Comput Biol* **13**, e1005437, doi:10.1371/journal.pcbi.1005437 (2017).
- 313 23 Asari, H. & Zador, A. M. Long-lasting context dependence constrains neural encoding models in rodent  
314 auditory cortex. *J Neurophysiol* **102**, 2638-2656, doi:10.1152/jn.00577.2009 (2009).
- 315 24 Schulz, A., Miehl, C., Berry, M. J., 2nd & Gjorgjieva, J. The generation of cortical novelty responses through  
316 inhibitory plasticity. *Elife* **10**, doi:10.7554/eLife.65309 (2021).
- 317 25 Jiang, Y. *et al.* Constructing the hierarchy of predictive auditory sequences in the marmoset brain. *Elife* **11**,  
318 doi:10.7554/eLife.74653 (2022).
- 319 26 Dana, H. *et al.* Thy1-GCaMP6 transgenic mice for neuronal population imaging in vivo. *PLoS One* **9**,  
320 e108697, doi:10.1371/journal.pone.0108697 (2014).
- 321 27 Francis, N. A. *et al.* Sequential transmission of task-relevant information in cortical neuronal networks.  
322 *Cell Rep* **39**, 110878, doi:10.1016/j.celrep.2022.110878 (2022).
- 323 28 Francis, N. A. *et al.* Small Networks Encode Decision-Making in Primary Auditory Cortex. *Neuron* **97**, 885-  
324 897 e886, doi:10.1016/j.neuron.2018.01.019 (2018).
- 325 29 Frisina, R. D. *et al.* F1 (CBAXC57) mice show superior hearing in old age relative to their parental strains:  
326 hybrid vigor or a new animal model for "golden ears"? *Neurobiol Aging* **32**, 1716-1724,  
327 doi:10.1016/j.neurobiolaging.2009.09.009 (2011).
- 328
